# Supplementary material for: Combination of Left Ventricular End-Diastolic Diameter and QRS Duration Strongly Predicts Good Response to and Prognosis of Cardiac Resynchronization Therapy
Source: Hindawi journal article supplement (doi:10.1155/2020/1257578), 2020-01-17
Supplement: f1 [file 1257578.f1.pdf]

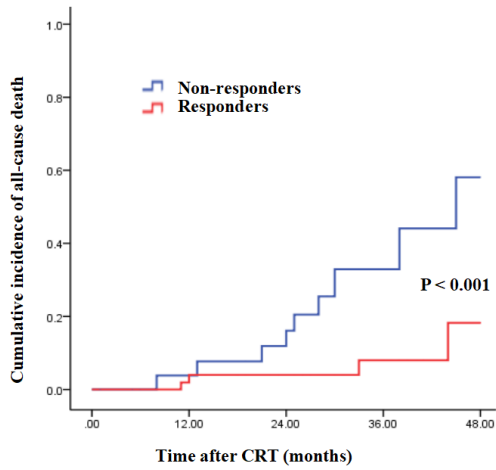

A

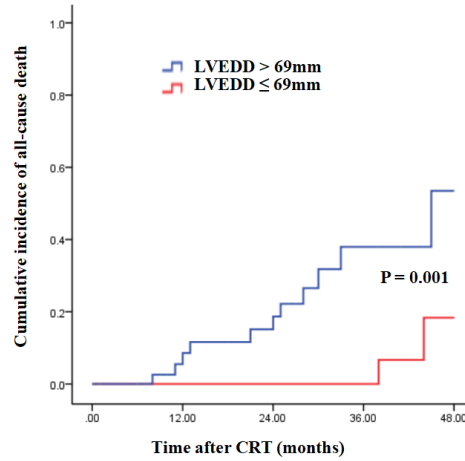

B

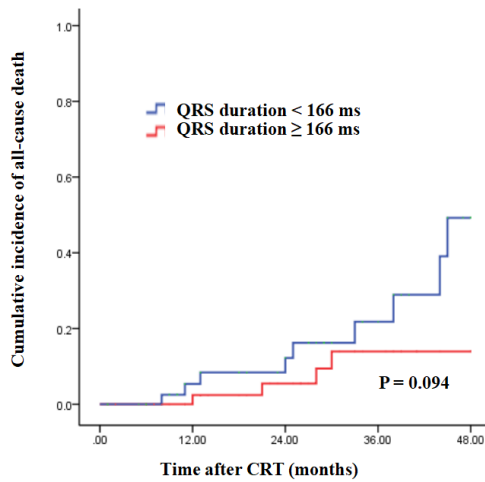

C

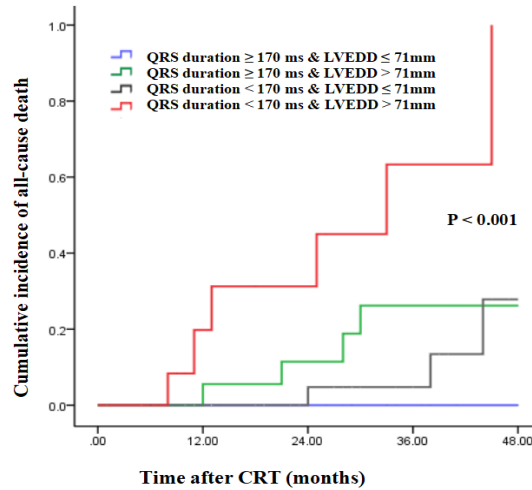

D

516  
517  
518  
519

520  
521  
522

523 **Supplemental Figure 1.** Four Kaplan-Meier curves for response category, LVEDD, QRS  
524 duration and combination of LVEDD and QRS duration of cumulative incidence of all-cause  
525 death at 4 years. (A) For cumulative incidence of all-cause death, responders (red line) performed  
526 better compared to non-responders (blue line). (B) For cumulative incidence of all-cause death,  
527 LVEDD  $\leq 69\text{mm}$  group (red line) performed better compared to LVEDD  $> 69\text{mm}$  group (blue  
528 line). (C) For cumulative incidence of all-cause death, there was no difference between QRS  
529 duration  $\leq 166\text{ms}$  group and QRS duration  $> 166\text{ms}$  group. (D) For cumulative incidence of  
530 all-cause death, combination of QRS duration  $\geq 170\text{ ms}$  and LVEDD  $\leq 71\text{mm}$  group performed  
531 the best compared to others.

532 LVEDD: left ventricular end-diastolic dimension

533  
534  
535

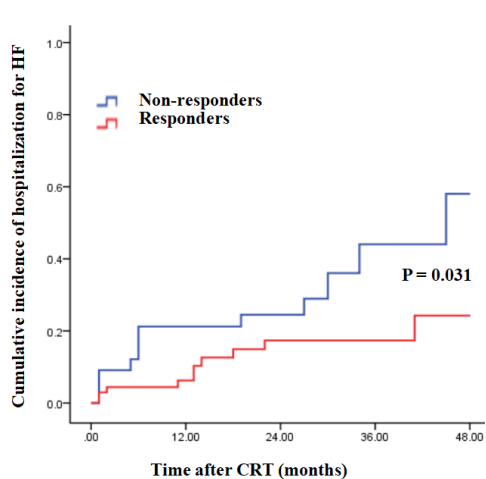

536

537

A

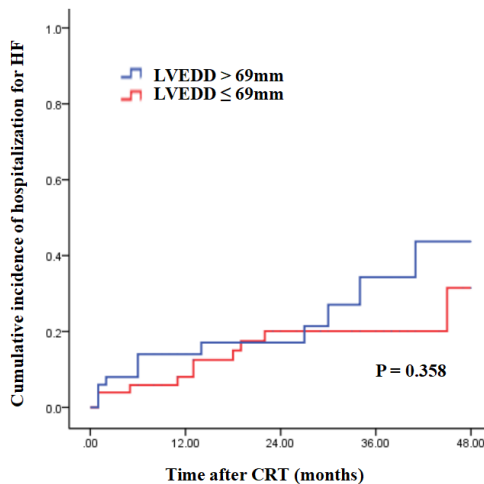

B

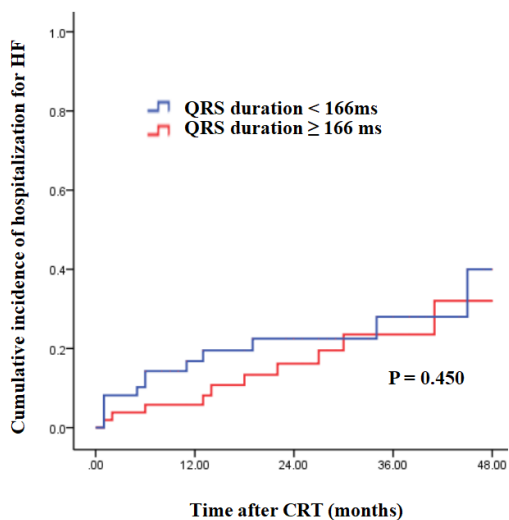

538

539

540

541

542

C

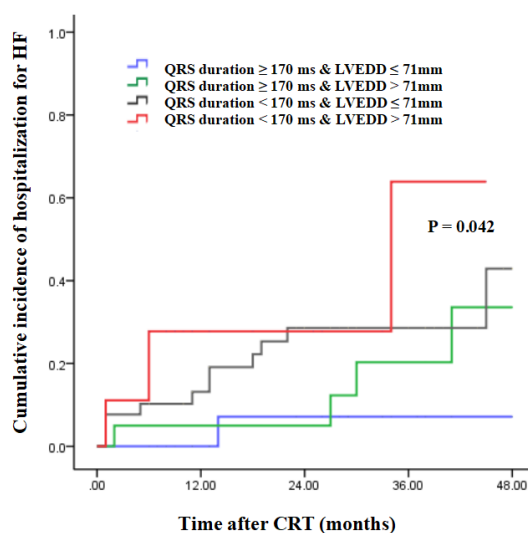

D

**Supplemental Figure 2.** Four Kaplan-Meier curves for response category, LVEDD, QRS duration and combination of LVEDD and QRS duration of cumulative incidence of hospitalization for heart failure at 4 years. (A) For cumulative incidence of hospitalization for heart failure at 4 years, responders (red line) performed better compared to non-responders (blue line). (B) For cumulative incidence of hospitalization for heart failure, there was no difference between LVEDD  $\leq 69$ mm group and LVEDD  $> 69$ mm group (red line). (C) For cumulative incidence of hospitalization for heart failure, there was no difference between QRS duration  $\leq 166$ ms group and QRS duration  $> 166$ ms group. (D) For cumulative incidence of hospitalization for heart failure, combination of QRS duration  $\geq 170$  ms and LVEDD  $\leq 71$ mm group (blue line) performed the best compared to others.

553 LVEDD: left ventricular end-diastolic dimension

554
